# Supplementary material for: Suppression of retinal degeneration by two novel ERAD ubiquitin E3 ligases SORDD1/2 in Drosophila
Source: PLoS Genet. 2020 Nov 2;16(11):e1009172. doi: 10.1371/journal.pgen.1009172 (PMC7660902; doi:10.1371/journal.pgen.1009172)
Supplement: S10 Data — (XLSX) [file pgen.1009172.s014.xlsx]

## Sheet: Sheet1
		control			sordd1/21			hrd11			sordd1/21; hrd11
	Rh1	1	1	1	0.9045	0.9461	0.8411	0.9341	0.8373	0.8483	0.4682	0.6492	0.6297
	INAD	1	1	1	0.9933	1.0681	0.9483	0.969	0.9624	0.9252	0.8622	0.911	1.0181
	TRP	1	1	1	0.9567	0.91	0.8584	1.002	0.8165	0.7884	1.0035	0.8916	0.8025
